# Supplementary material
Source: PubMed Central journal article supplement (PMC8313512)
Supplement: ofab171_suppl_supplementary_figure_1.pdf [file ofab171_suppl_supplementary_figure_1.pdf]

**Supplemental Figure 1: Contact testing cascade, stratified by initial symptoms  
(June 8<sup>th</sup> – August 31<sup>st</sup>, 2020)**

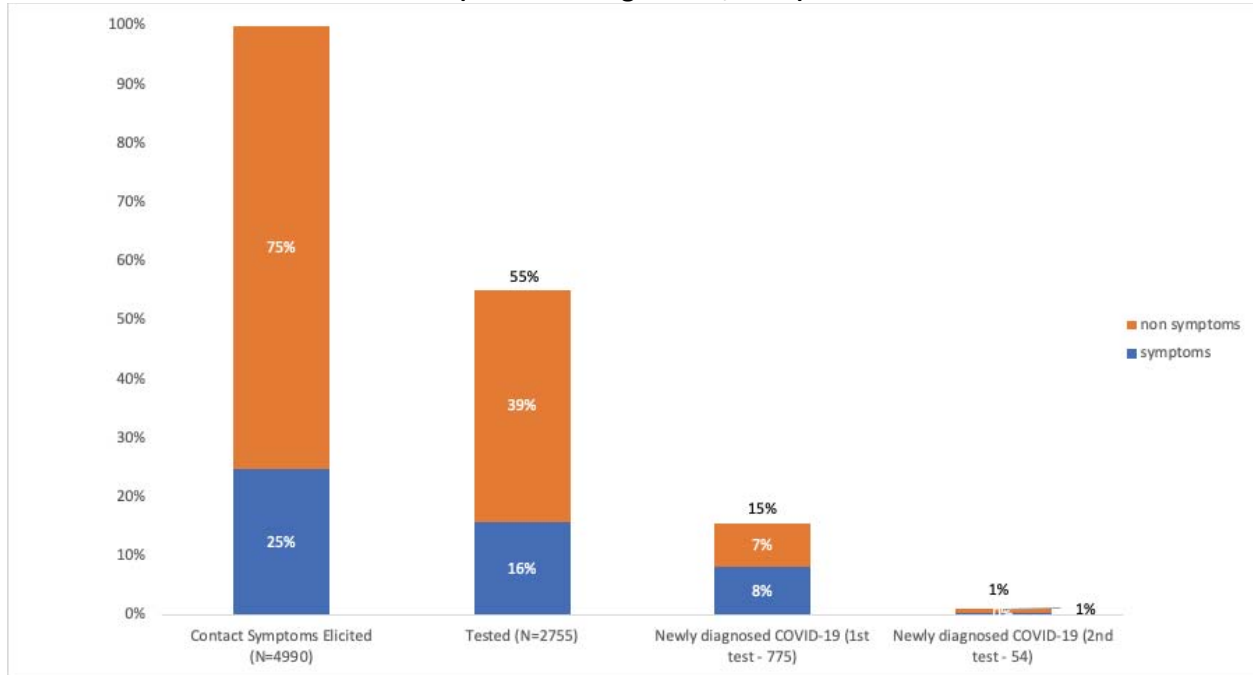

**Footnote:** Total contacts for study period, n=6946; among which symptom data was available for (n=4990)
